# Supplementary material
Source: Springer Nature journal article supplement (https://www.springermedizin.de/resource/supplementary/12958_2013_1173_MOESM5_ESM.pdf/9566704)

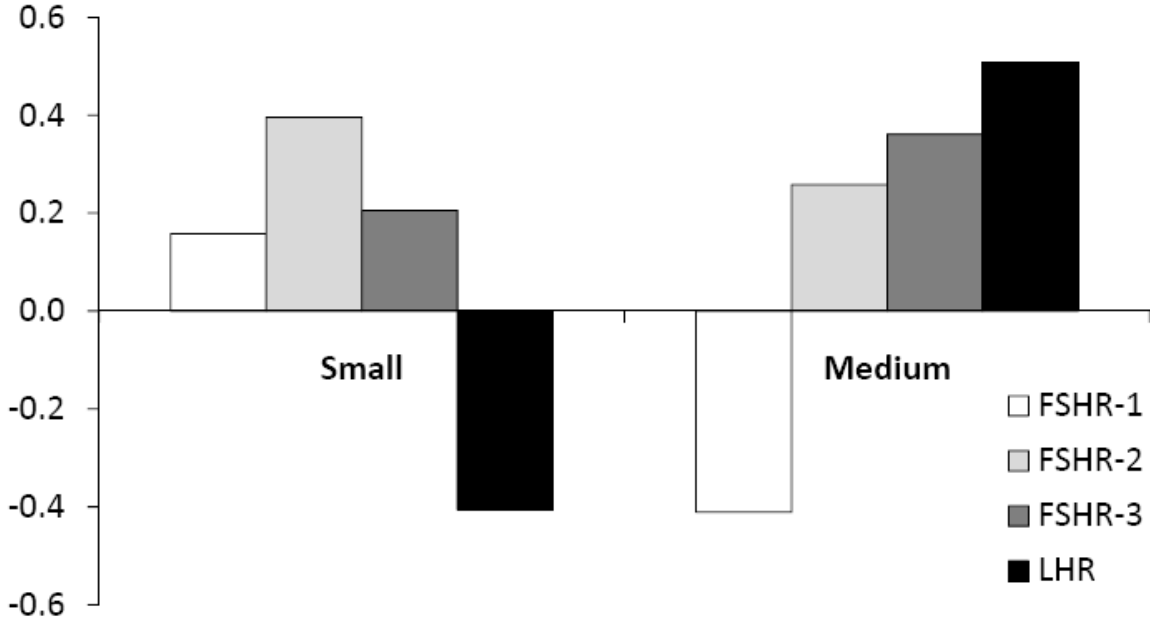

Supplement: MOESM5 [file 9566704]
